# Supplementary material for: Thermogravimetric analysis of the co-combustion of coal and polyvinyl chloride
Source: PLoS One. 2019 Oct 28;14(10):e0224401. doi: 10.1371/journal.pone.0224401 (PMC6816570; doi:10.1371/journal.pone.0224401)
Supplement: S15 Fig — (XLS) [file pone.0224401.s015.xls]

## Sheet: Sheet1
0	405.6	531.2	--	493.1
20	408.4	534.2	395.7	494.5
50	412.9	542.1	394.5	494.2
80	418.4	560.6	394.6	493.5
100	420.1	586.2	394.2	--
