# Supplementary material for: Thermogravimetric analysis of the co-combustion of coal and polyvinyl chloride
Source: PLoS One. 2019 Oct 28;14(10):e0224401. doi: 10.1371/journal.pone.0224401 (PMC6816570; doi:10.1371/journal.pone.0224401)
Supplement: S20 Fig — (XLS) [file pone.0224401.s020.xls]

## Sheet: Sheet1
0	--	3.2
20	3	2.9
50	7	2.6
80	13.4	3.8
100	18.1	4.3
